# Supplementary material for: A Promising Approach to Treat Psoriasis: Inhibiting Cytochrome P450 3A4 Metabolism to Enhance Desoximetasone Therapy
Source: MDPI journal article supplement (doi:10.3390/pharmaceutics15082016), 2023-07-25
Supplement: s1 [file s1]

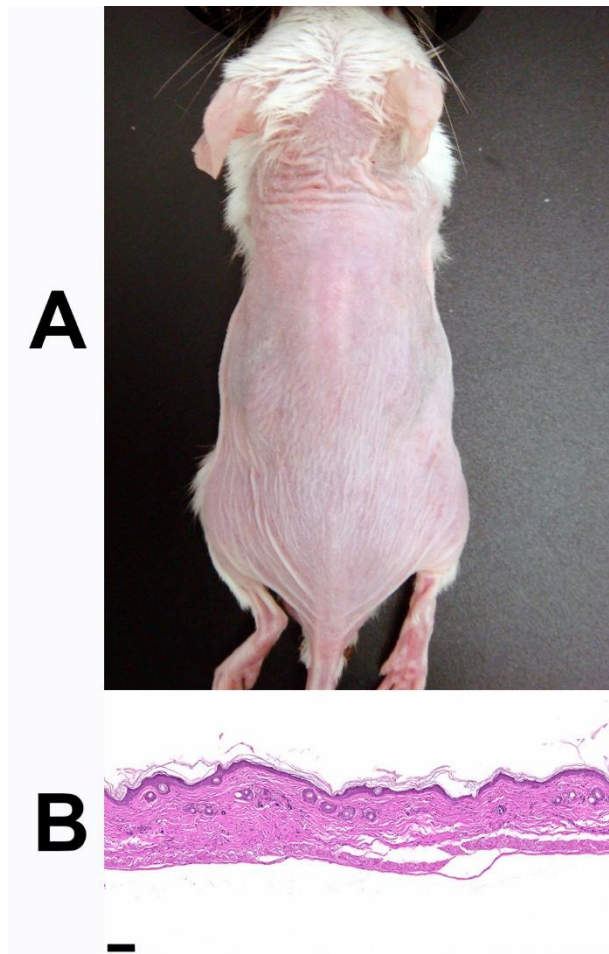

**Figure S1.** Effects of Clobetasol Treatment on Day 12.

The Clobetasol treatment resulted in a reduction in skin scale and thinner epidermis on Day 12. (A) Morphology (B) H&E staining. Scale bar = 100  $\mu\text{m}$ .
